# Supplementary material for: RAB6 and dynein drive post‐Golgi apical transport to prevent neuronal progenitor delamination
Source: PubMed Central journal article supplement — EMBO Rep. 2022 Aug 18;23(10):e54605. doi: 10.15252/embr.202254605 (PMC9535803; doi:10.15252/embr.202254605), 2022-08-18
Supplement: EMBR-23-e54605-s005.pdf [file EMBR-23-e54605-s005.pdf]

## Expanded View Figures

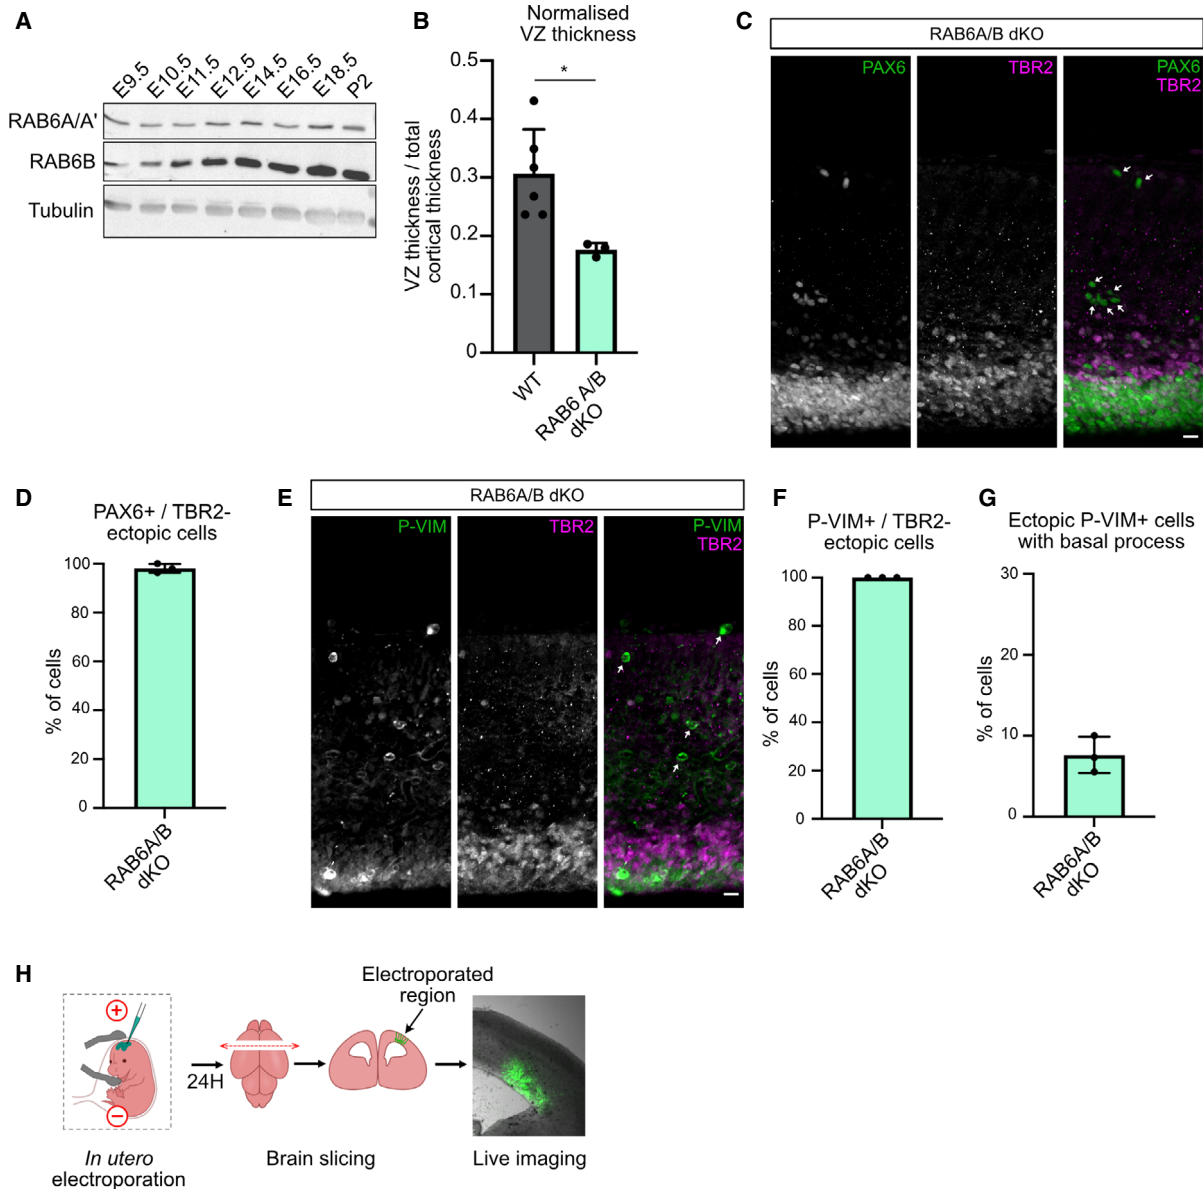

**Figure EV1. RAB6 A/B dKO leads to ectopic TBR2-negative basal progenitors.**

- A RAB6A/A' and RAB6B expression in the developing brain and at P2.
- B Ventricular zone (VZ) thickness normalized to total cortical thickness in  $N = 6$  WT brains and  $N = 3$  RAB6A/B dKO. Mann-Whitney  $U$  test,  $*P \leq 0.05$ .
- C PAX6 and TBR2 staining in RAB6A/B dKO E15.5 brains. Arrows indicate detached PAX6+/TBR2- cells. Scale bar = 25  $\mu$ m.
- D Percentage of ectopic PAX6+/TBR2- cells in RAB6A/B dKO E15.5 brains. RAB6A/B dKO: 470 cells from  $N = 3$  brains.
- E P-VIM and TBR2 staining in RAB6A/B dKO E15.5 brains. Arrows indicate detached P-VIM+/TBR2- cells. Scale bar = 25  $\mu$ m.
- F Percentage of ectopic P-VIM+/TBR2- cells in RAB6A/B dKO E15.5 brains. RAB6A/B dKO: 99 cells from  $N = 3$  brains.
- G Percentage of ectopic P-VIM+ cells that maintained a basal process in RAB6A/B dKO E15.5 brains. RAB6A/B dKO: 99 cells from  $N = 3$  brains.
- H Schematic representation of *in utero* electroporation and live imaging procedure in the mouse developing cortex.

Data information: All error bars indicate SD.

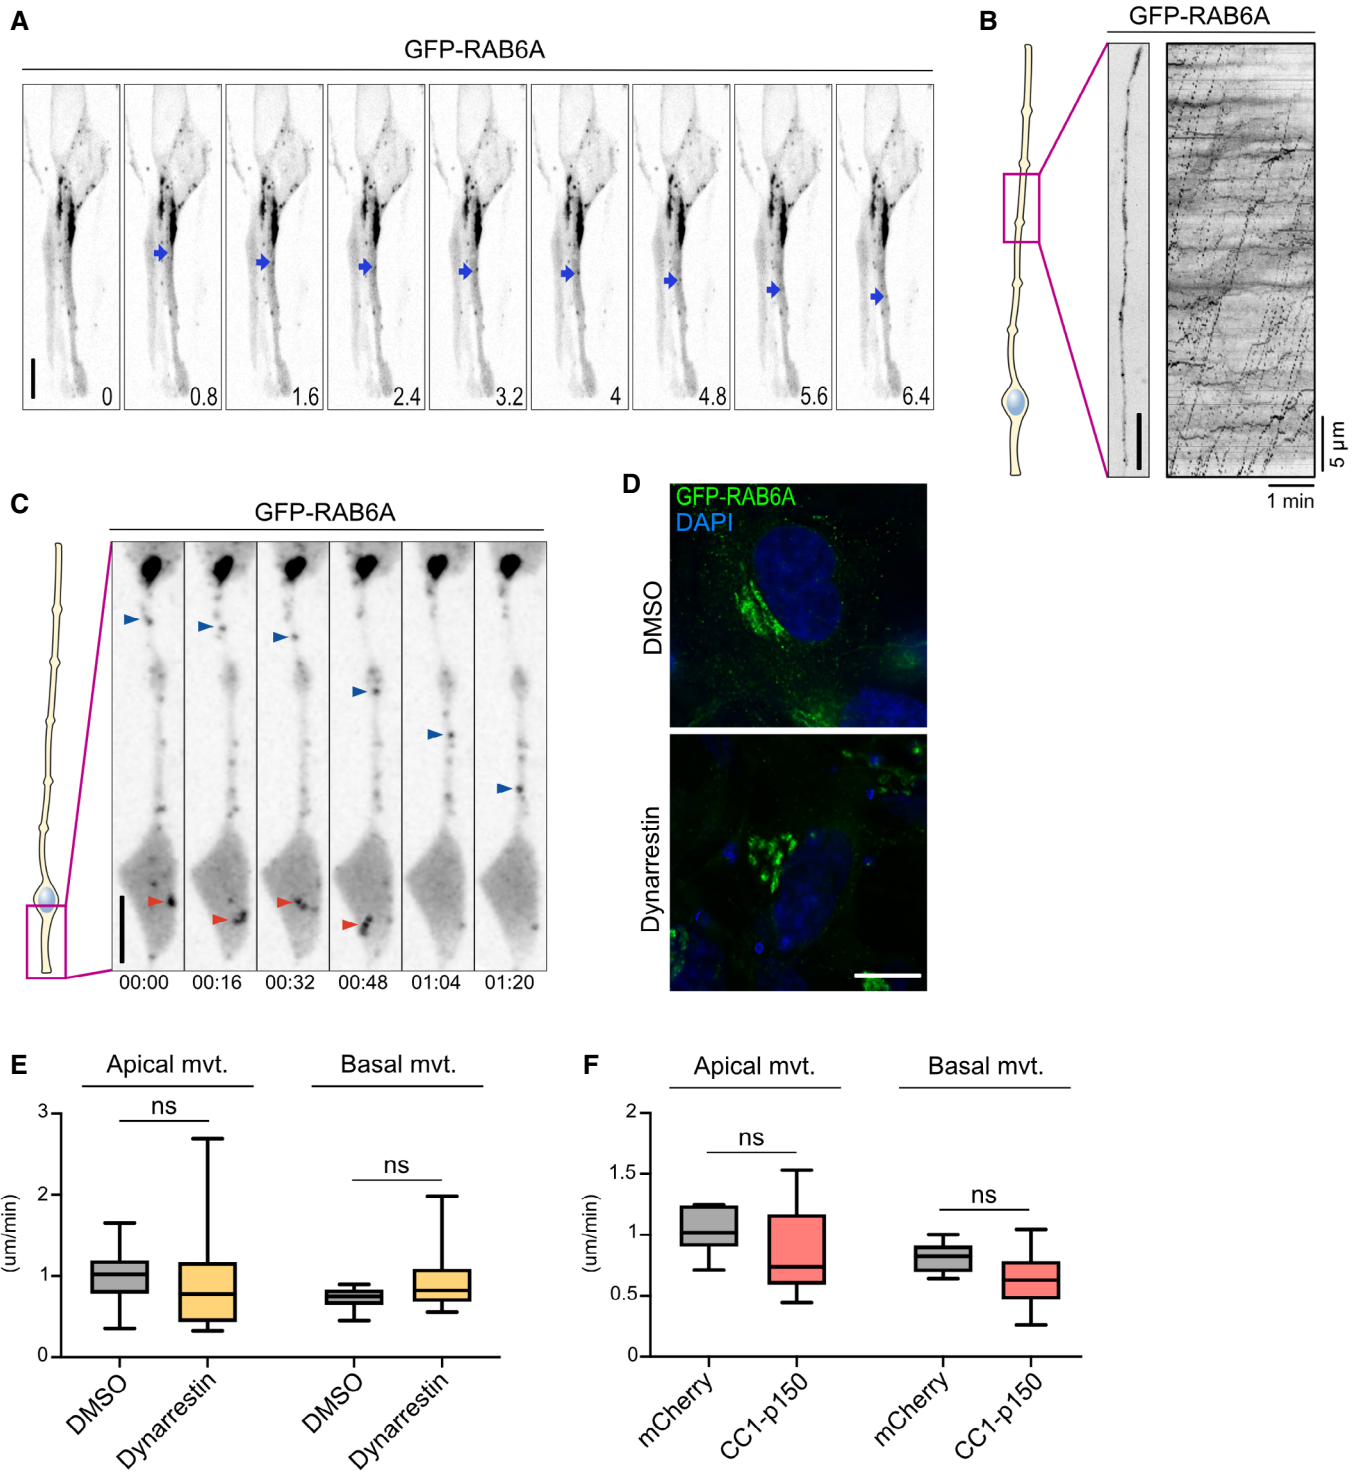

Figure EV2.

◀ **Figure EV2. RAB6A dynamics in aRG cells and dynarrestin validation.**

- A Live imaging of GFP-RAB6A in the apical process of an aRG cell at E15.5. At 0.8 s, a tubule is budding from the Golgi, leading to the formation of an apically moving vesicle. Blue arrowhead indicates RAB6A+ vesicle. Scale bar = 5  $\mu$ m.
- B Live imaging of GFP-RAB6A in the basal process of an aRG cell at E15.5. Right: kymograph. Scale bar = 5  $\mu$ m.
- C Live imaging of GFP-RAB6A in the apical process of an aRG cell at E15.5. Red arrowhead: a RAB6A+ vesicle can be seen disappearing in the endfoot, suggesting fusion with the apical membrane. Blue arrowhead: a RAB6A+ vesicle moving apically within the apical process. Scale bar = 10  $\mu$ m.
- D RPE-1 cells transfected with GFP-RAB6A to visualize the Golgi apparatus architecture, and treated for 4 h with 100  $\mu$ M dynarrestin or DMSO. Scale bar = 10  $\mu$ m.
- E Velocity of apically and basally moving RAB6A vesicles within the apical process of DMSO and dynarrestin-treated aRG cells. In all, 142 vesicles from  $N = 7$  cells for DMSO, 74 vesicles from  $N = 18$  cells for dynarrestin.
- F Velocity of apically and basally moving RAB6A vesicles within the apical process of mCherry control and CC1-p150-expressing aRG cells. In all, 120 vesicles from  $N = 17$  cells for mCherry control, 39 vesicles from  $N = 11$  cells for CC1-p150.

Data information: (E, F) Mann-Whitney  $U$  test. Boxplots whiskers indicate min and max, boxes indicate 25<sup>th</sup> and 75<sup>th</sup> percentiles, and central band indicates the median.

**Figure EV3. CRB3 exits the Golgi within RAB6+ vesicles.** ▶

- A SBP-CRB3-GFP and GalNacT2-mCherry expression in aRG cells before and 45 min after addition of biotin. SBP-CRB3-GFP relocates from a diffuse perinuclear localization to the Golgi. Scale bar = 5  $\mu$ m.
- B SBP-CRB3-GFP and mCherry-RAB6A localization in HeLa cells before and 40 min after addition of biotin. Scale bar = 5  $\mu$ m. White arrowheads: colocalizing foci.
- C Quantification of SBP-CRB3-GFP and mCherry-RAB6A colocalization away from the Golgi apparatus 40 min after biotin addition.  $N = 16$  cells from three independent experiments.
- D SBP-CRB3-GFP and mCherry-RAB6A localization in dissociated aRG cells cultivated *in vitro*, 40 min after addition of biotin. Scale bar = 5  $\mu$ m. Yellow arrowheads: colocalizing foci.
- E Quantification of SBP-CRB3-GFP and mCherry-RAB6A colocalization away from the Golgi apparatus 40 min after biotin addition.  $N = 14$  cells from three independent experiments.
- F SBP-CRB3-GFP and mCherry-RAB6A localization in aRG cells cultivated within brain slices, 40 min after addition of biotin. Scale bar = 5  $\mu$ m. Yellow arrowheads: colocalizing foci.
- G Quantification of SBP-CRB3-GFP and mCherry-RAB6A colocalization away from the Golgi apparatus 40 min after biotin addition.  $N = 15$  cells from three independent experiments.

Data information: All error bars indicate SD.

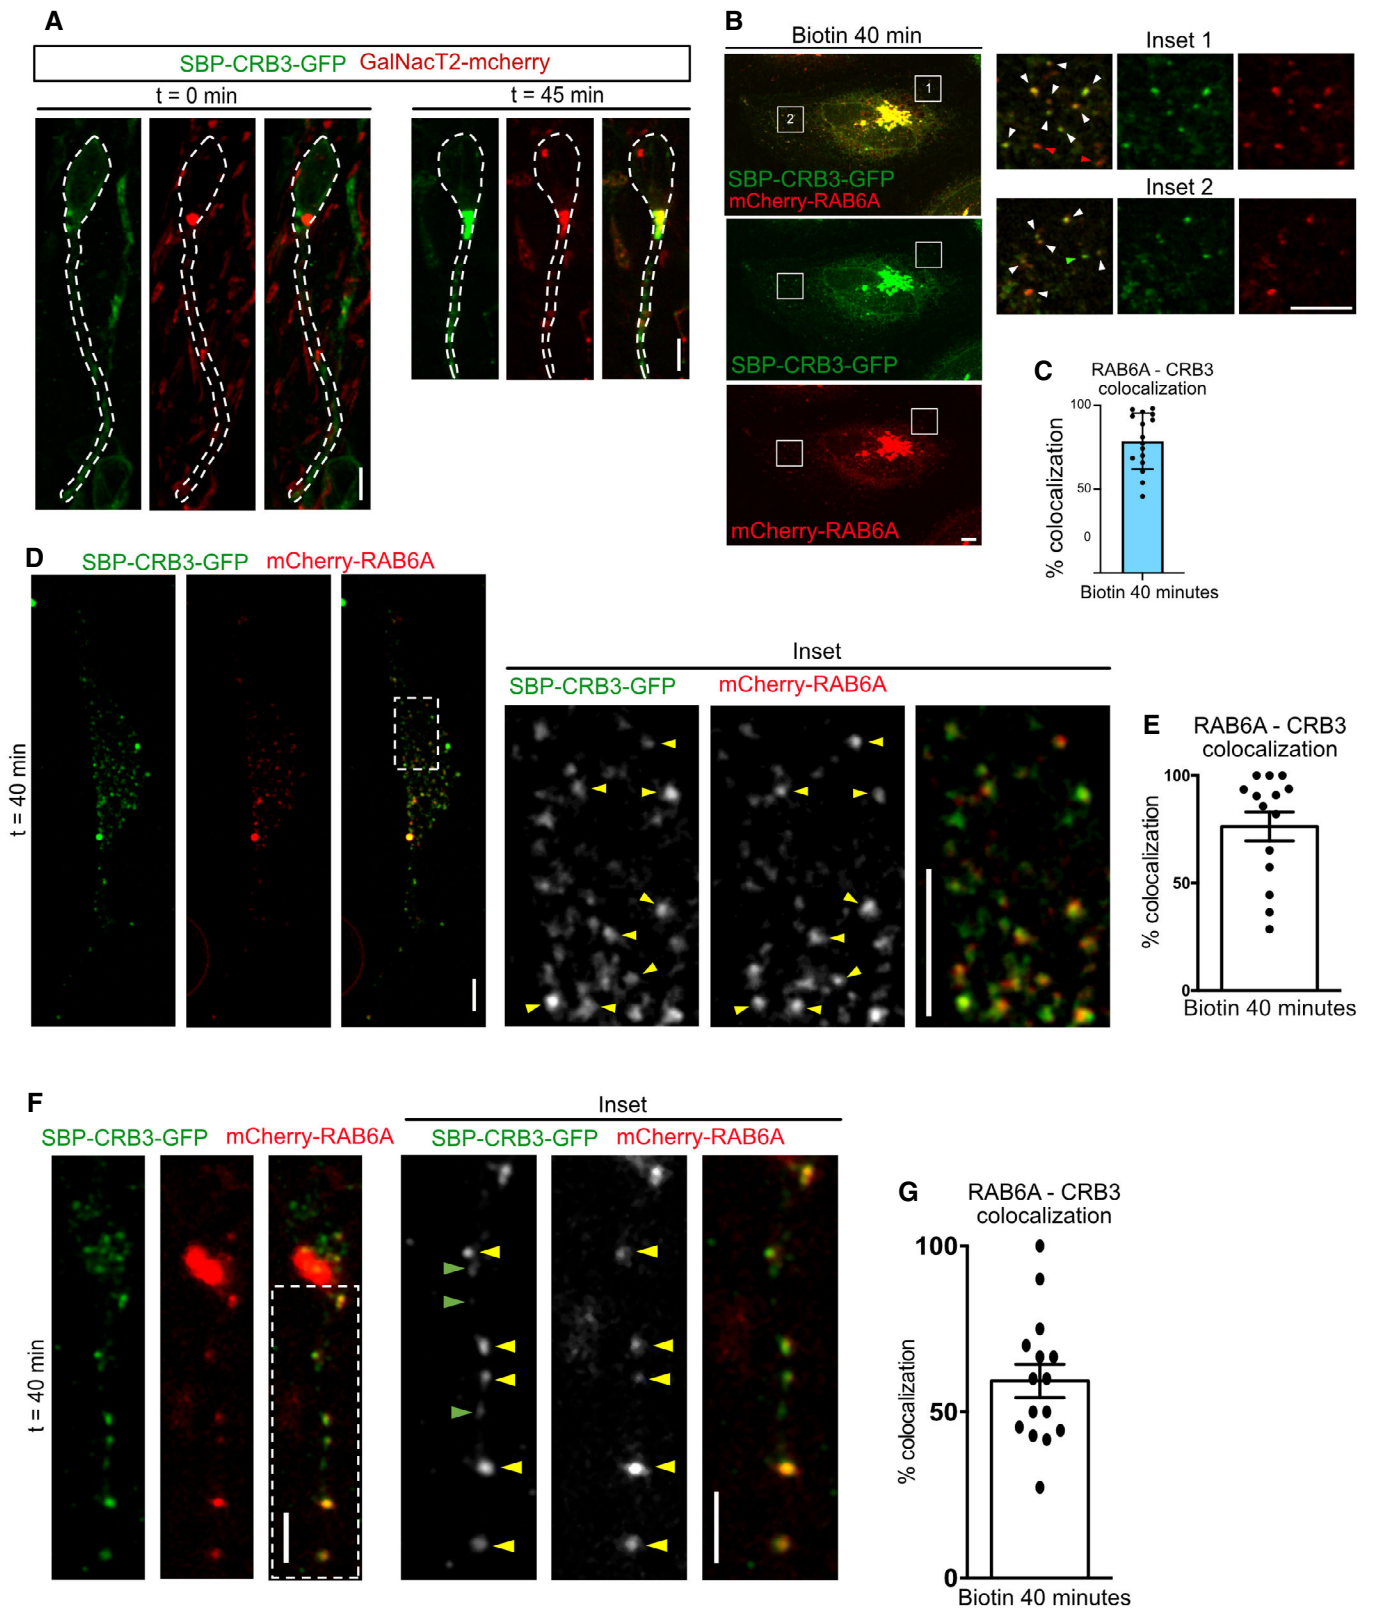

Figure EV3.

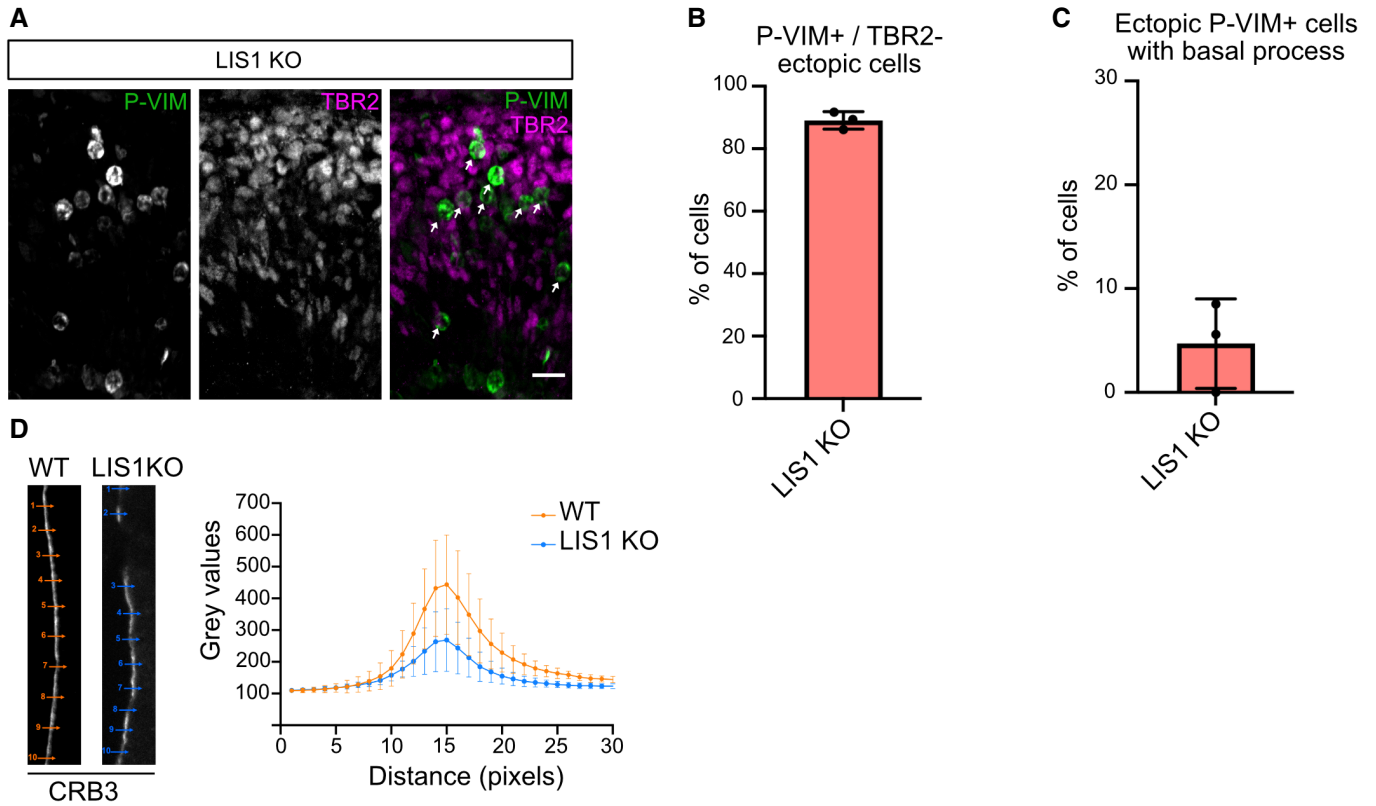

**Figure EV4. LIS1 KO leads to ectopic TBR2-negative basal progenitors.**

A P-VIM and TBR2 staining in *LIS1 KO* E12.5 brains. Arrows indicate detached P-VIM+/TBR2- cells. Scale bar = 25  $\mu$ m.

B Percentage of ectopic P-VIM+/TBR2- cells in *LIS1 KO* E12.5 brains. *LIS1 KO*: 301 cells from  $N = 3$  brains. Error bars indicate SD.

C Percentage of ectopic P-VIM+ cells that maintained a basal process in *LIS1 KO* E12.5 brains. *LIS1 KO*: 301 cells from  $N = 3$  brains. Error bars indicate SD.

D CRB3 average apical signal intensity  $\pm$  SEM in WT and *LIS1 KO* E12.5 brains.  $N = 3$  brains per condition.
